# Supplementary material for: Evaluation of Leukocytes, B and T Lymphocytes, and expression of CD200 and CD23 on B lymphocytes in Patients with Atopic Dermatitis on Dupilumab Therapy—Pilot Study
Source: PubMed Central journal article supplement — Dermatol Ther (Heidelb). 2023 Apr 25;13(5):1171–92. doi: 10.1007/s13555-023-00918-y (PMC10149535; doi:10.1007/s13555-023-00918-y), 2023-04-25

# **Evaluation of leukocytes, B and T lymphocytes and CD200 and CD23 expression in atopic dermatitis patients on dupilumab therapy – pilot study**

<sup>1</sup>Jarmila Čelakovská, <sup>2</sup>Eva Čermáková, <sup>3</sup>Petra Boudková, <sup>3</sup>Ctirad Andrys, <sup>3</sup>Jan Krejsek

<sup>1</sup>Department of Dermatology and Venereology Faculty Hospital and Medical Faculty of Charles University, Hradec Králové, 50002, Czech Republic

<sup>2</sup>Department of Medical Biophysics, Medical Faculty of Charles University, Hradec Králové, 50002, Czech republic

<sup>3</sup>Department of Clinical Immunology and Allergy, Faculty Hospital and Medical Faculty of Charles University, Hradec Králové, 50002, Czech Republic

## **The first author and corresponding author**

Assoc. Prof. Jarmila Čelakovská, MD, Ph.D

Department of Dermatology and Venereology, Faculty Hospital and Medical Faculty of Charles University, Hradec Králové, Czech Republic

**CelakovskaJ@lfhk.cuni.cz**

## **GRAPHS TO TABLES 2-6**

# GRAPHS TO TABLE 2. LEUKOCYTES

Absolute leukocytes ( $10^9/l$ )

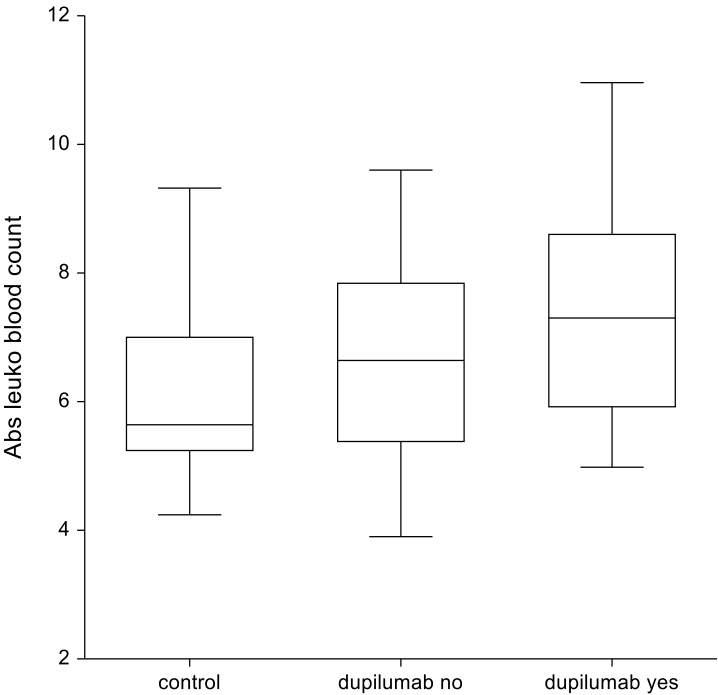

Absolute lymphocytes ( $10^9/l$ )

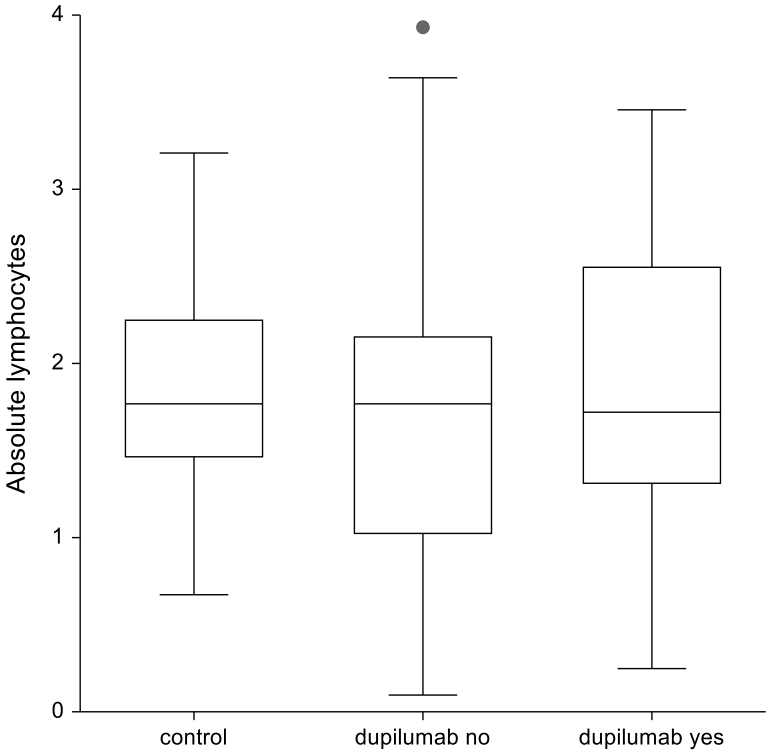

### Relative neutrophils (%)

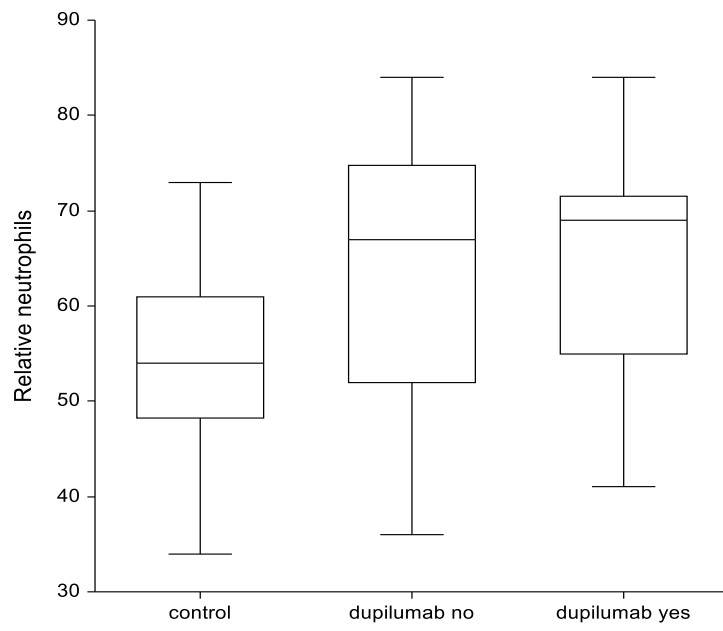

### Absolute neutrophils ( $10^9/l$ )

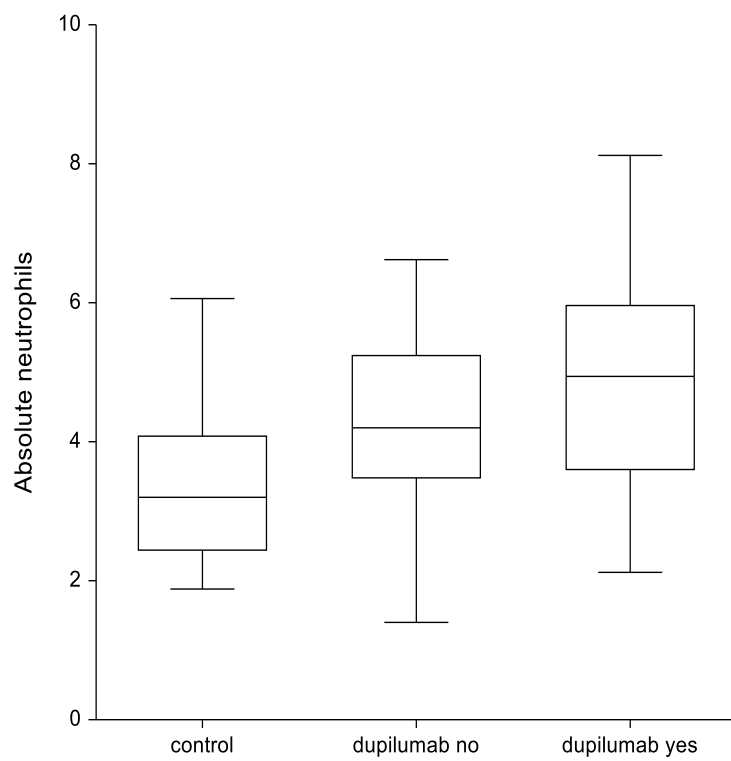

**Relative monocytes (%)**

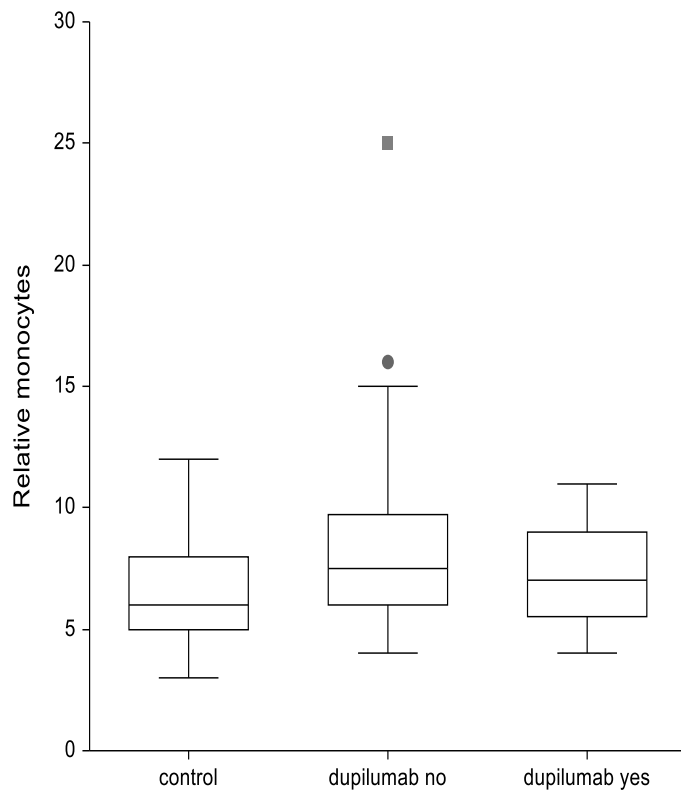

**Absolute monocytes (10<sup>9</sup>/l)**

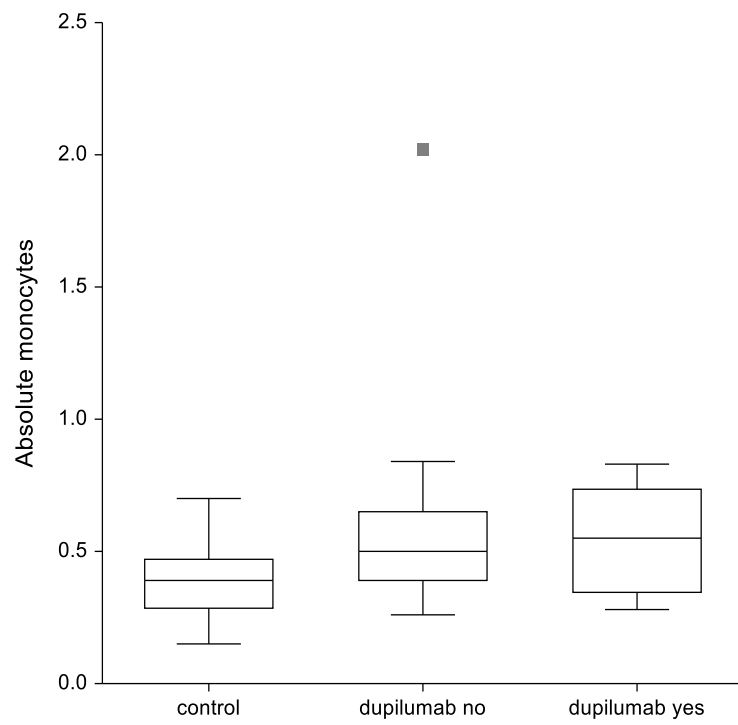

### Relative eosinophils (%)

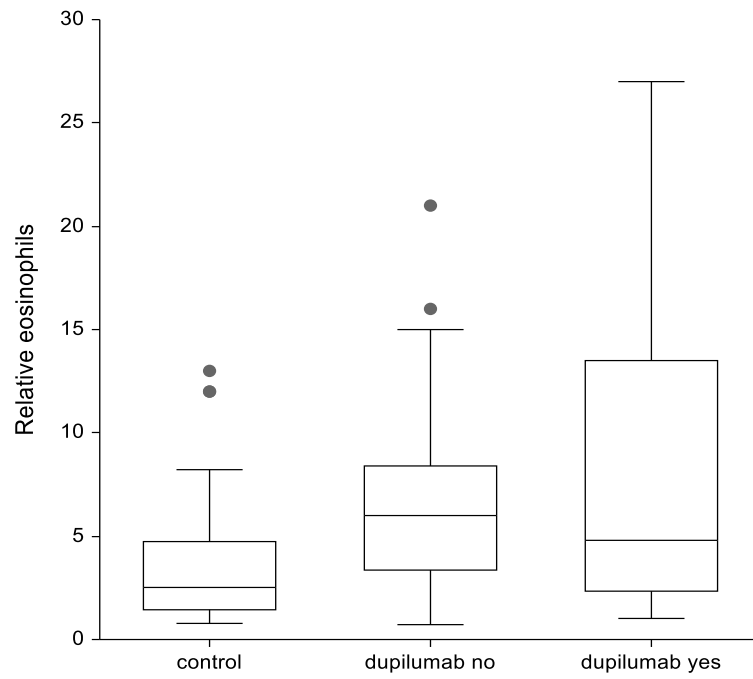

### Absolute eosinophils ( $10^9/l$ )

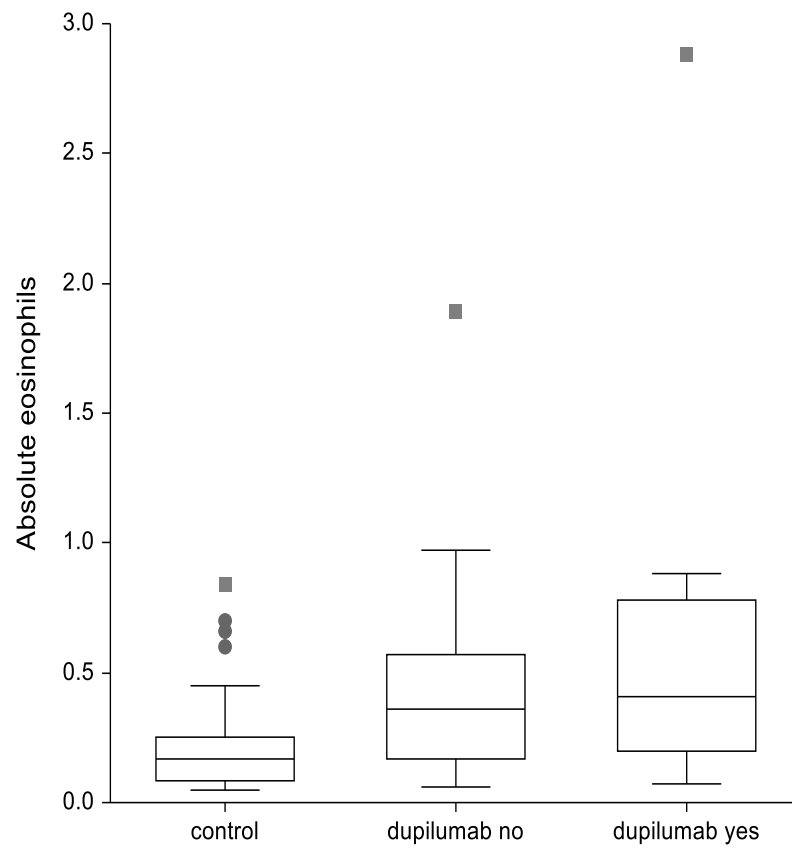

**Relative basophils (%)**

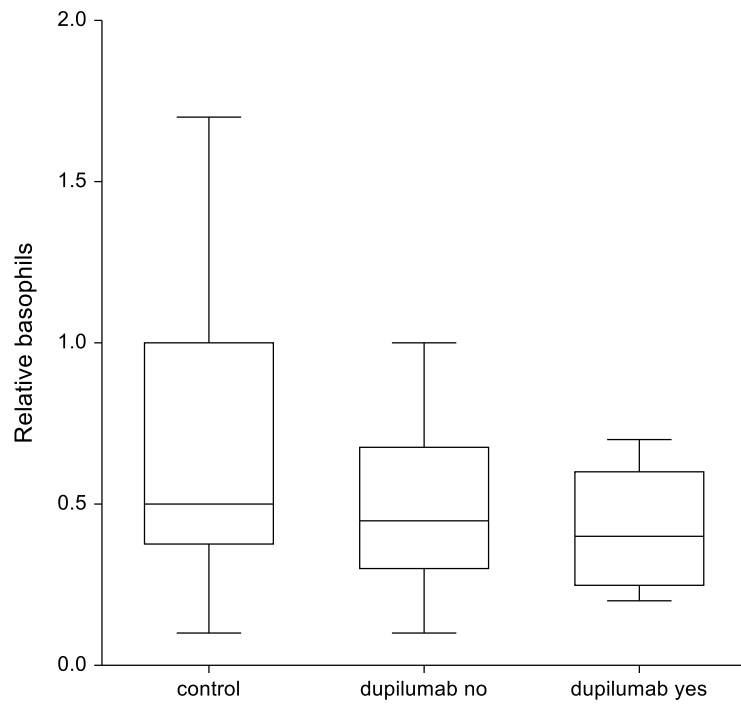

**Absolute basophils ( $10^9/l$ )**

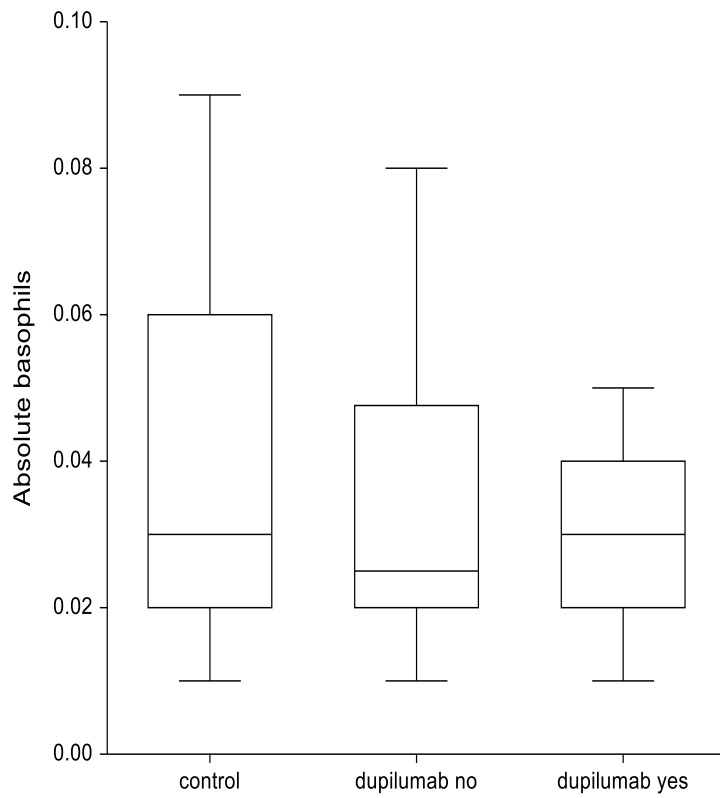

**GRAPHS TO TABLE 3. T LYMPHOCYTES**

**Relative T lymphocytes (%)**

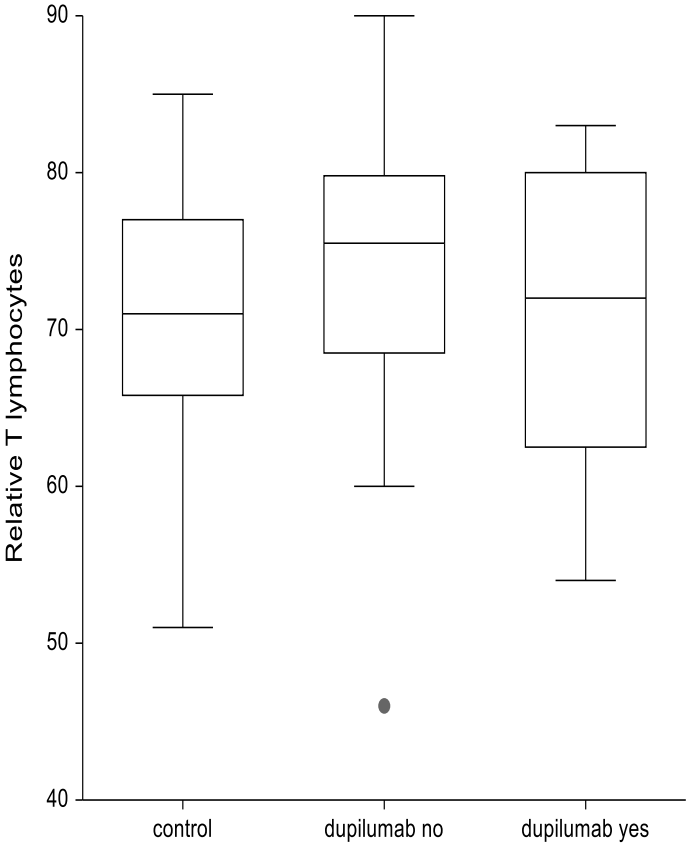

**Absolute T lymphocytes (10<sup>9</sup>/l)**

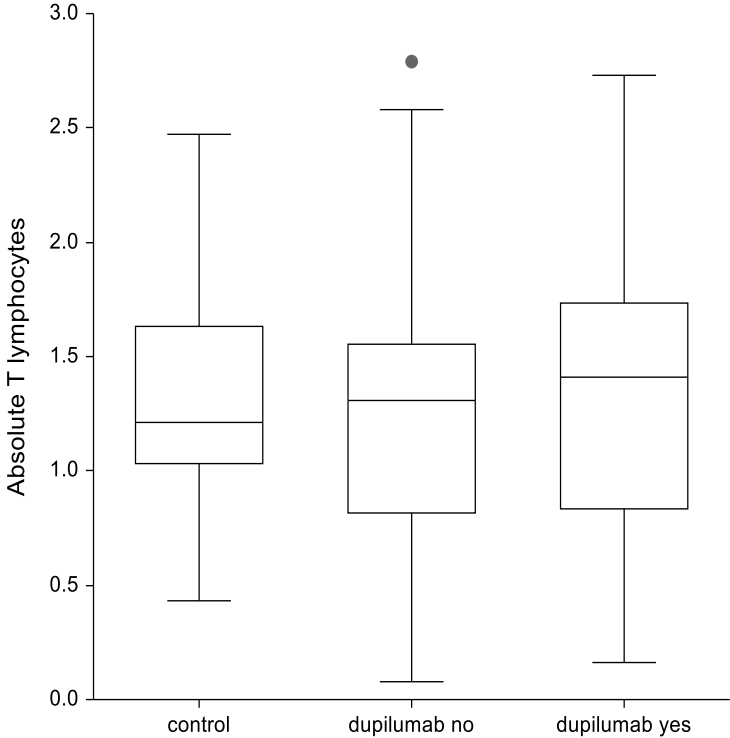

**Relative natural killers (NK) cells (%)**

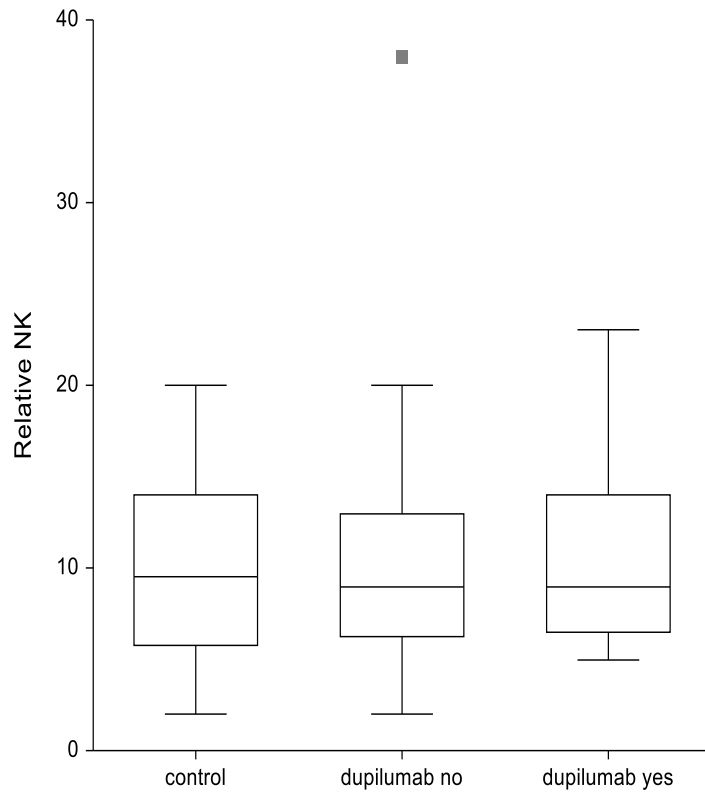

**Absolute natural killers (NK) cells ( $10^9/l$ )**

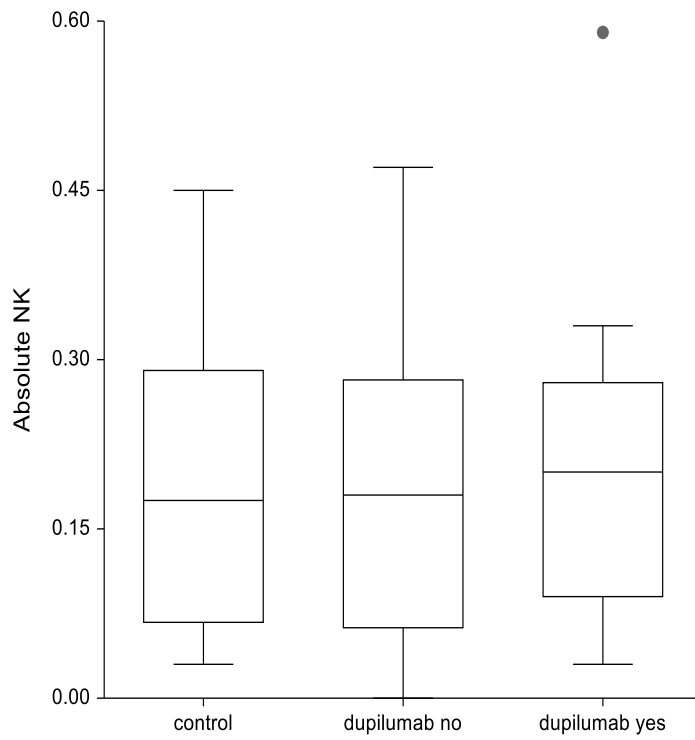



**Relative CD4+ T lymphocytes (%)**

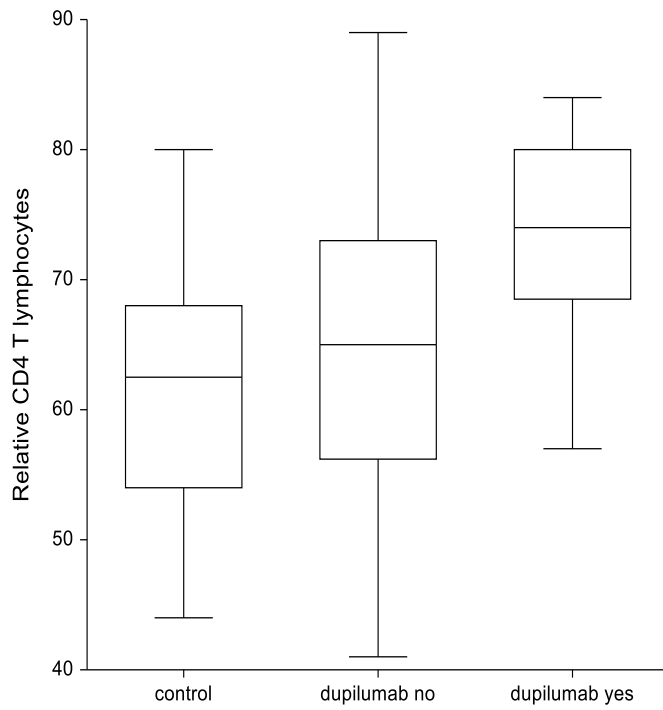

**Absolute CD4+ T lymphocytes ( $10^9/l$ )**

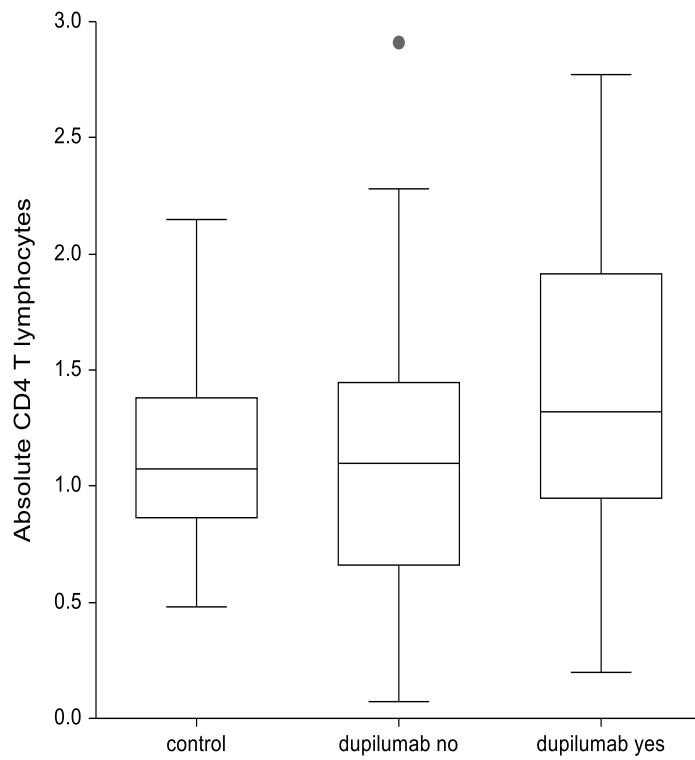

**Relative CD8+ T lymphocytes (%)**

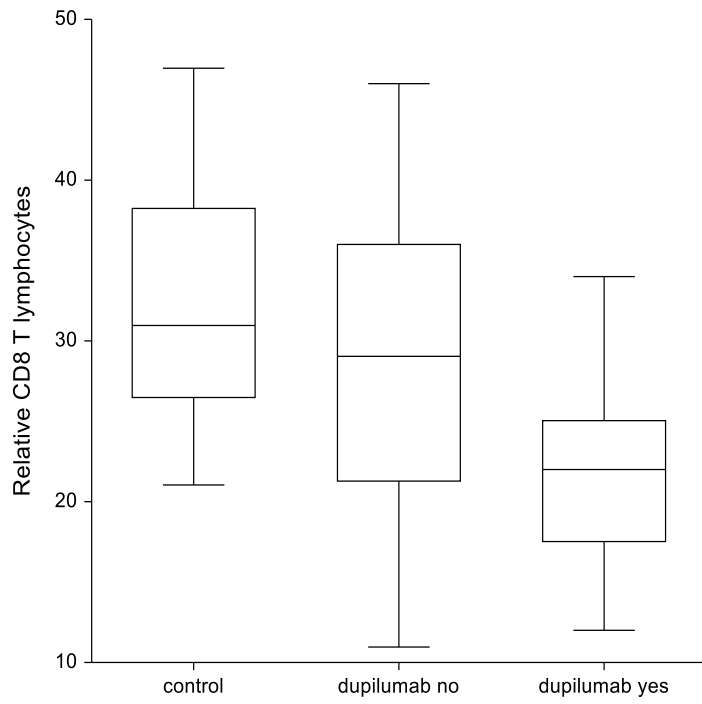

**Absolute CD8+ T lymphocytes ( $10^9/l$ )**

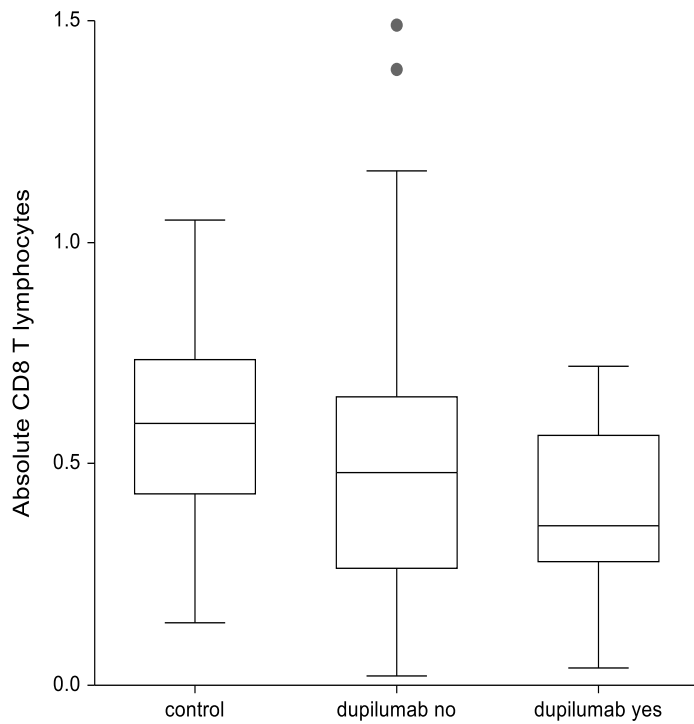

**Relative T regulatory lymphocytes (%)**

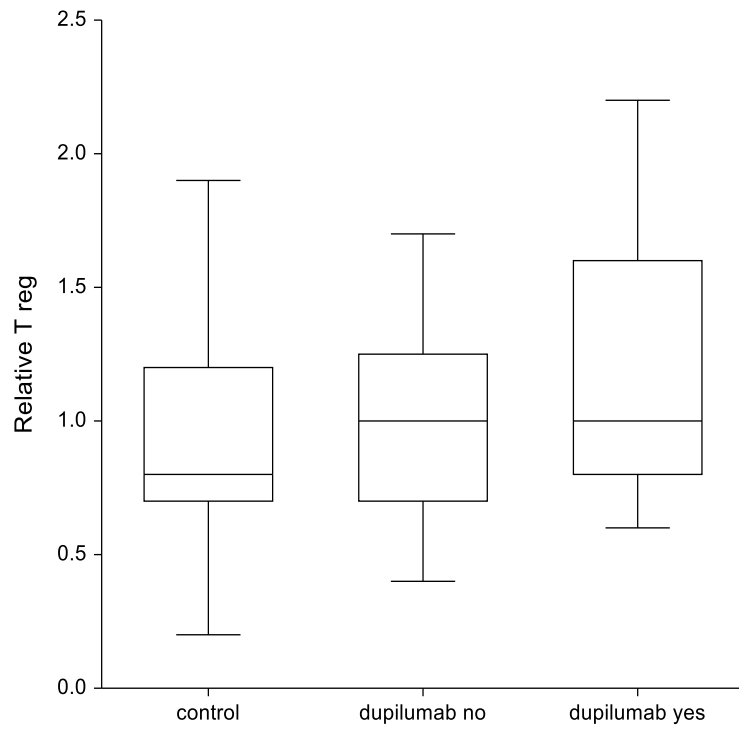

**Absolute T regulatory lymphocytes ( $10^9/l$ )**

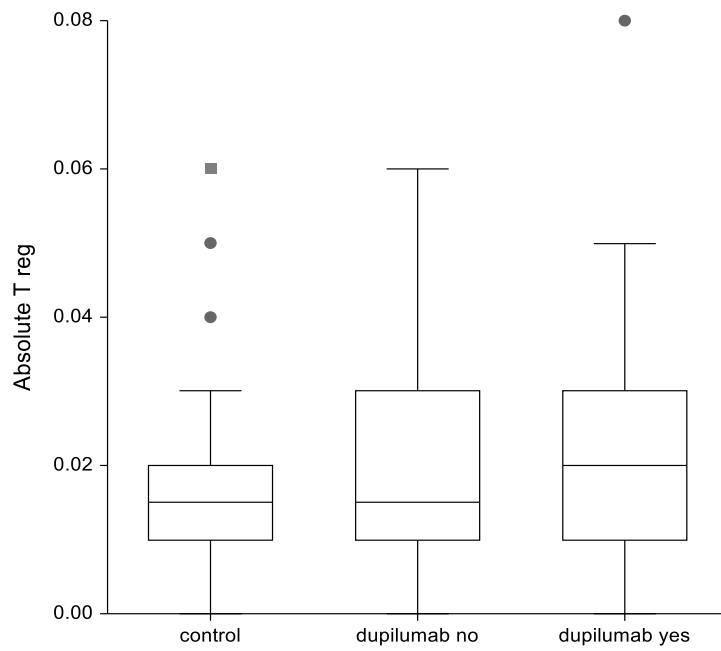

**GRAPHS TO TABLE 4. B LYMPHOCYTES**

**Relative B lymphocytes (%)**

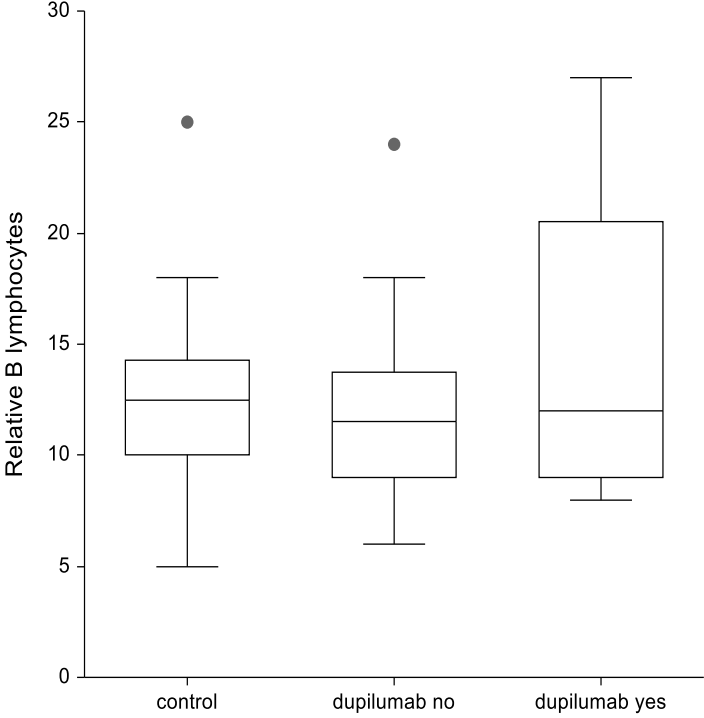

**Absolute B lymphocytes (10<sup>9</sup>/l)**

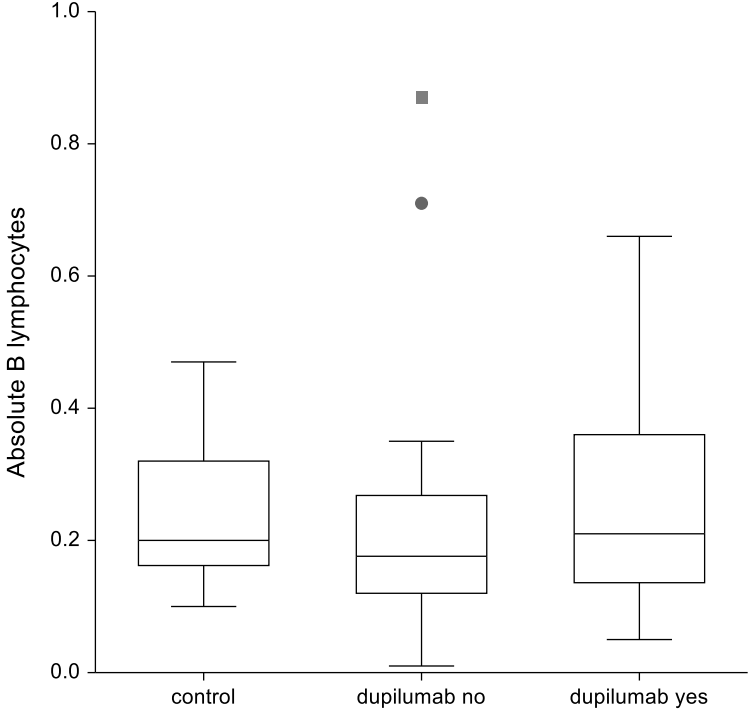

**Total memory B lymphocytes (%)**

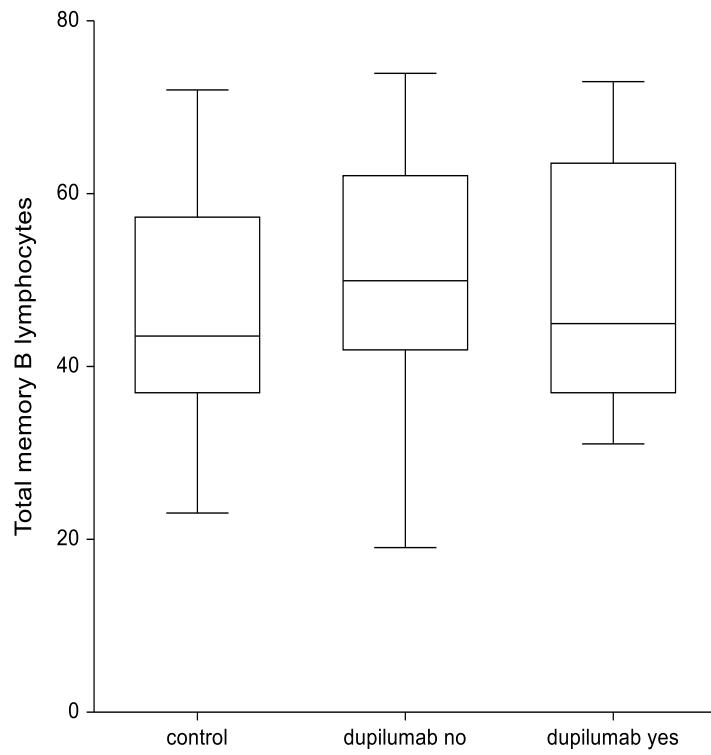

**B lymphocytes naive (%)**

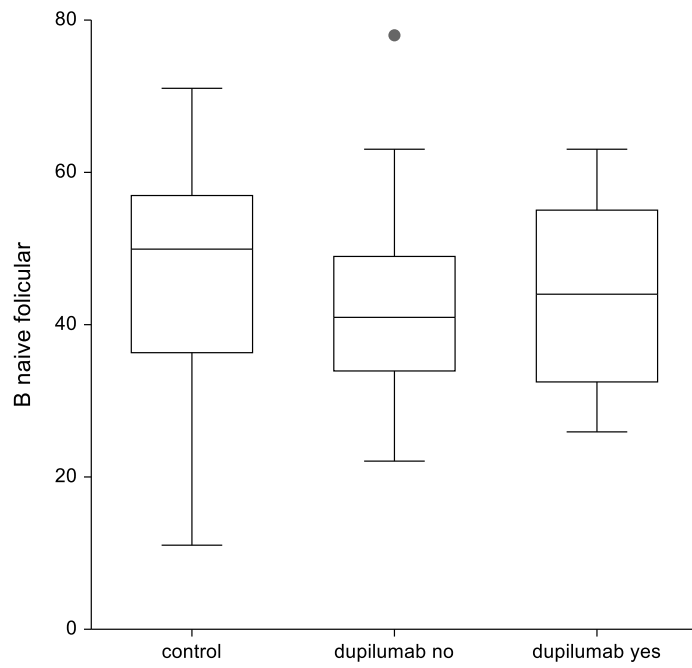

**B lymphocytes non-switched marginal (%)**

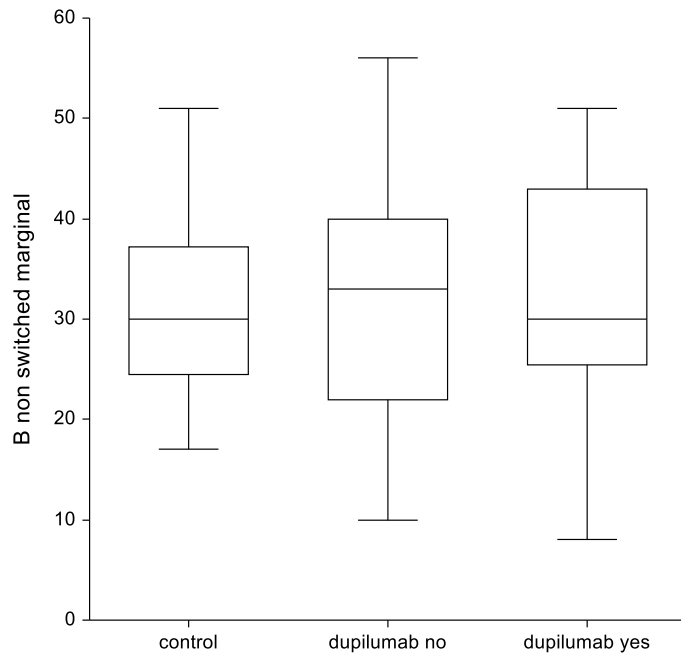

**B lymphocytes switched (%)**

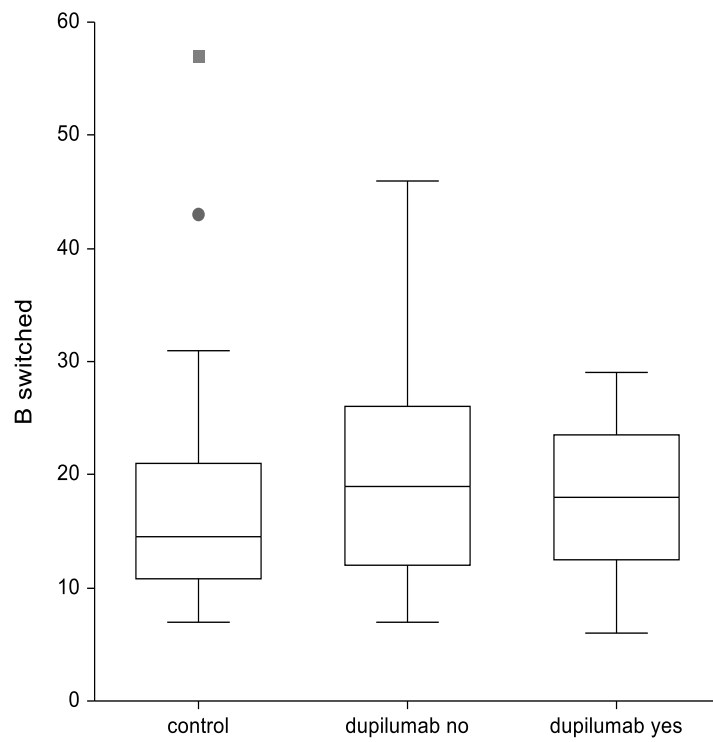

**Transitional B lymphocytes (%)**

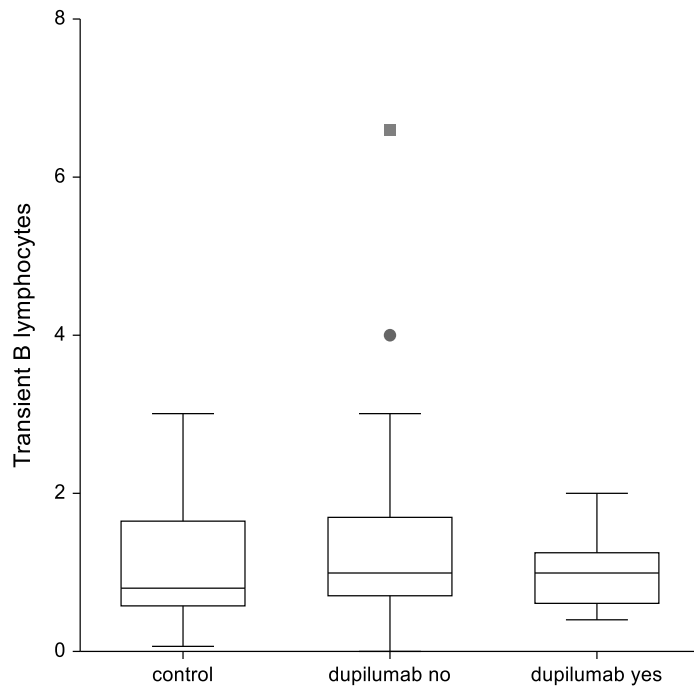

**GRAPHS TO TABLE 5. EXPRESSION OF CD23 ON B LYMPHOCYTES SUBSETS**

**Expression of CD23 on memory B lymphocytes (MFI)**

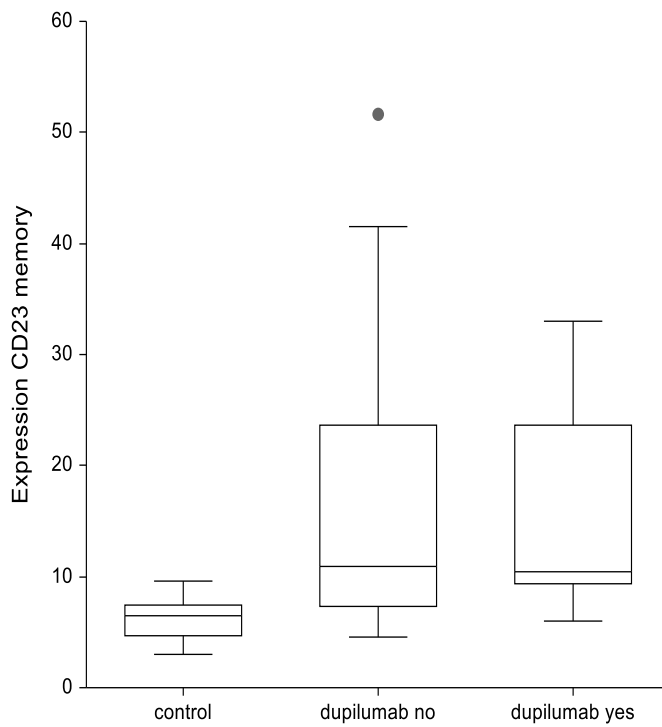

**Expression of CD23 on memory B lymphocytes (%)**

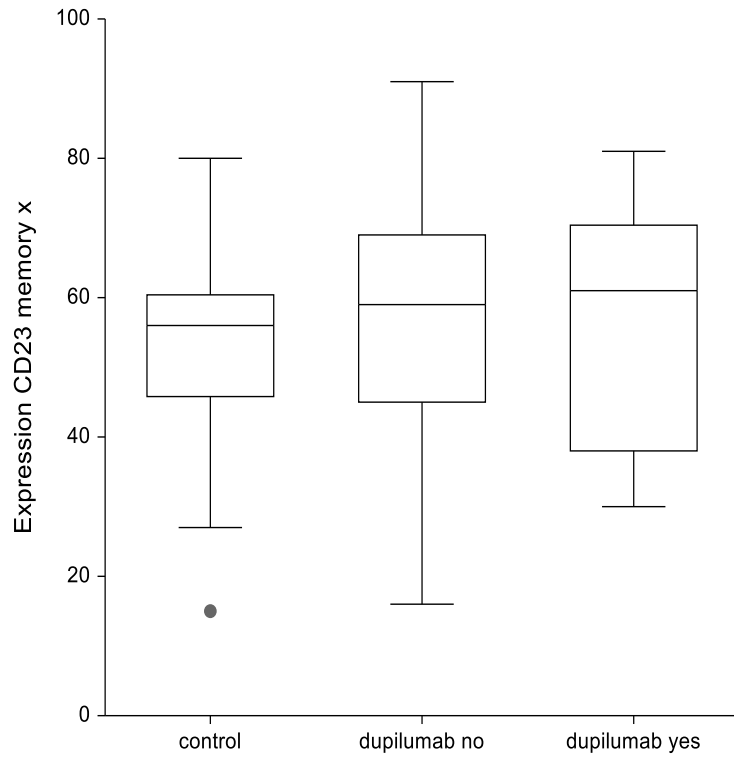

**Expression of CD23 on naive B lymphocytes (MFI)**

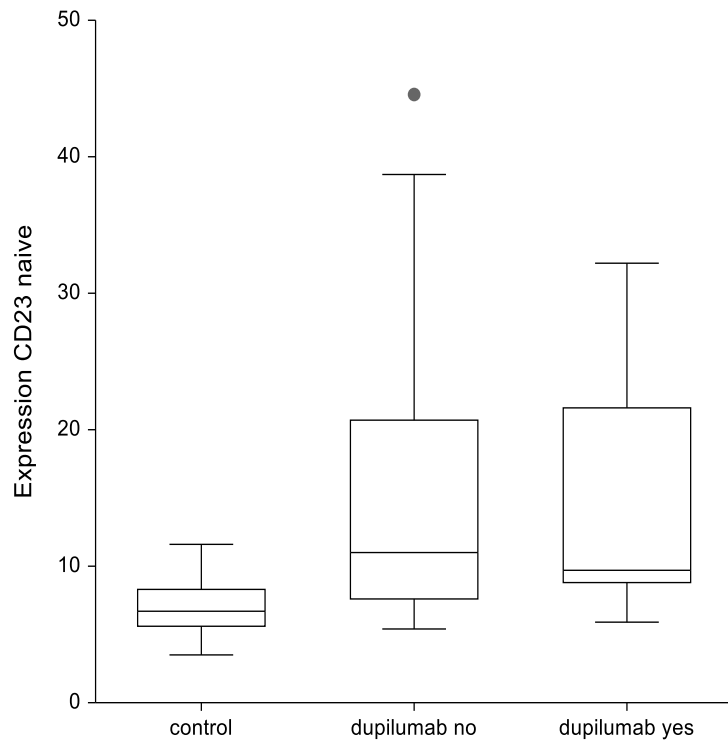



**Expression of CD23 on naive B lymphocytes (%)**

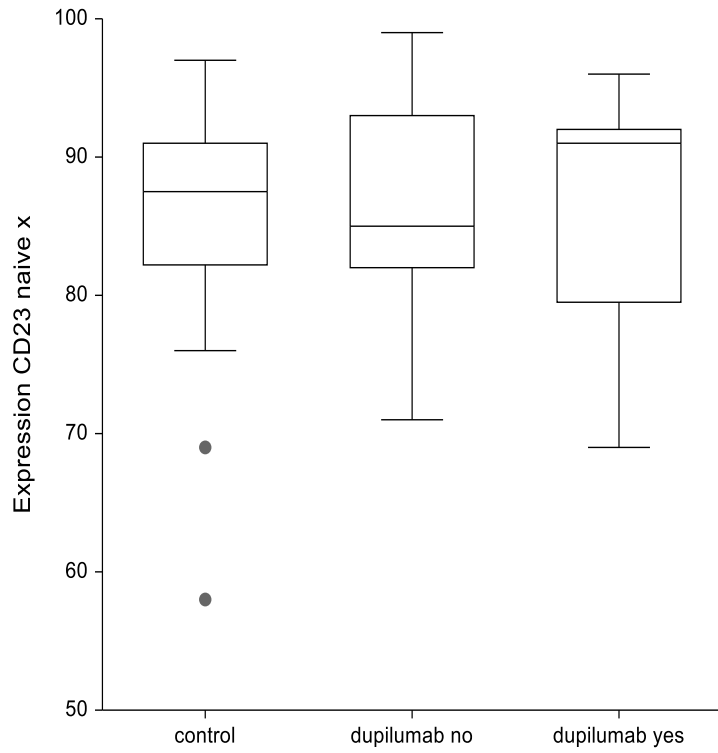

**Expression of CD23 on non-switched B lymphocytes (MFI)**

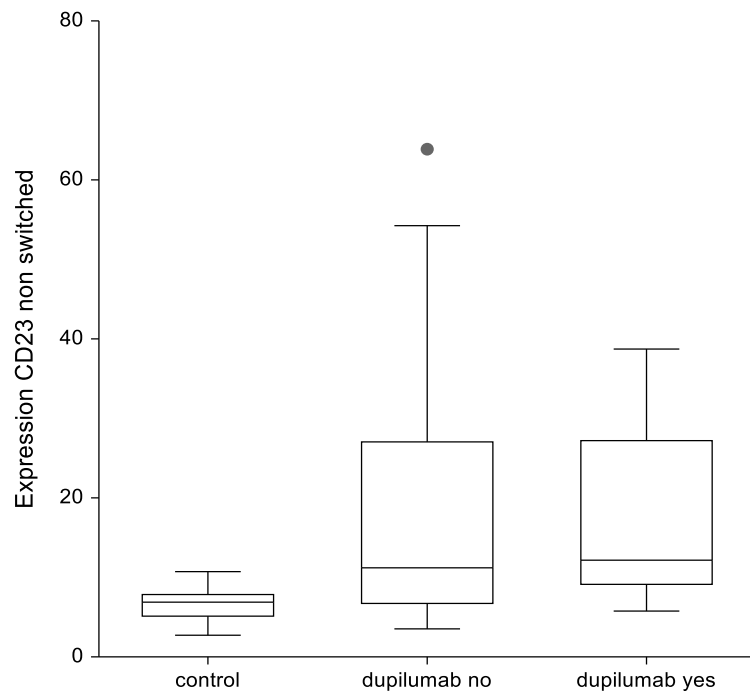

**Expression of CD23 on non-switched B lymphocytes (%)**

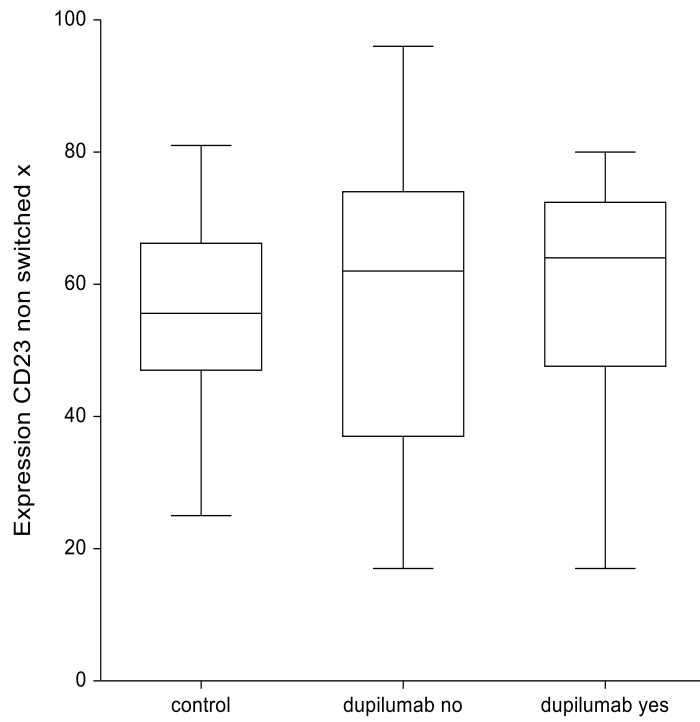

**Expression of CD23 on switched B lymphocytes (MFI)**

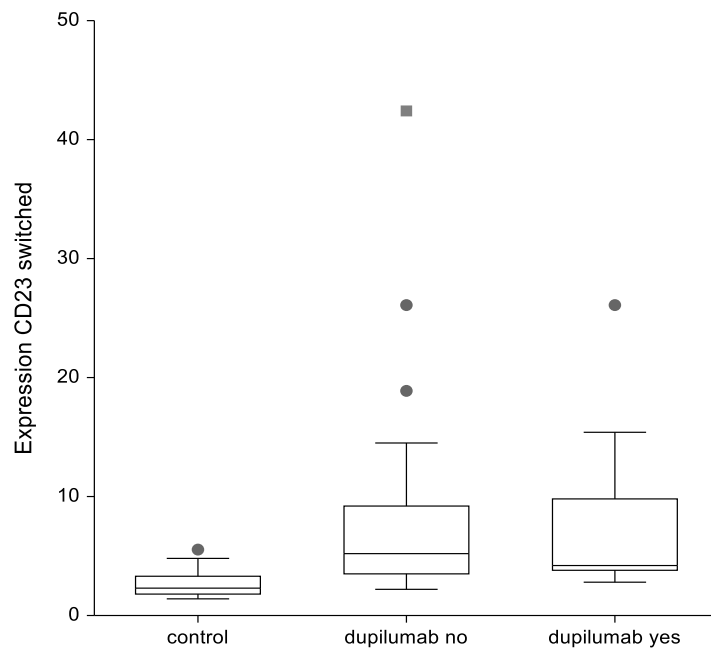

**Expression of CD23 on switched B lymphocytes (%)**

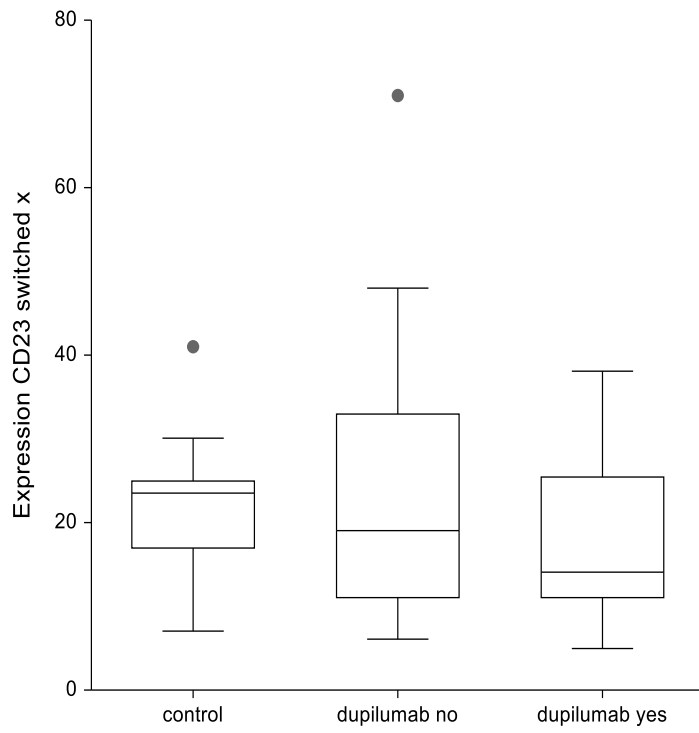

**Expression of CD23 on total B lymphocytes (MFI)**

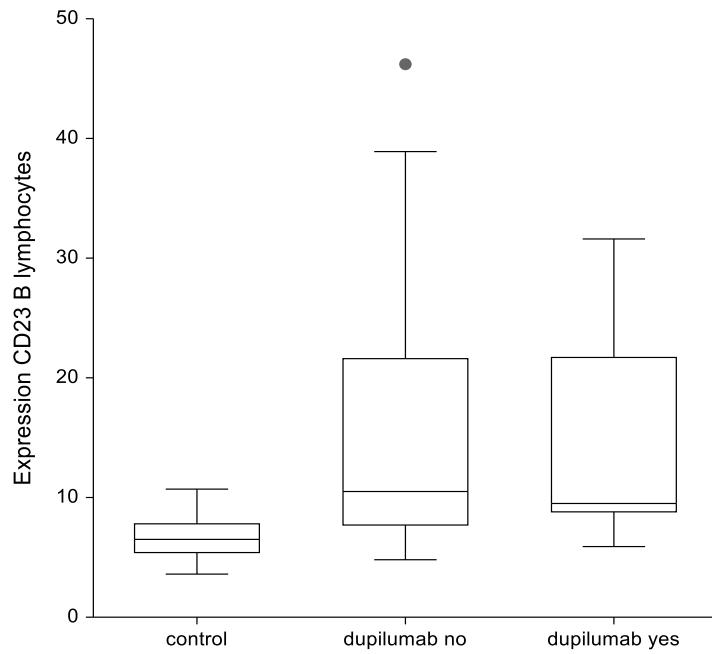

**Expression of CD23 on total B lymphocytes (%)**

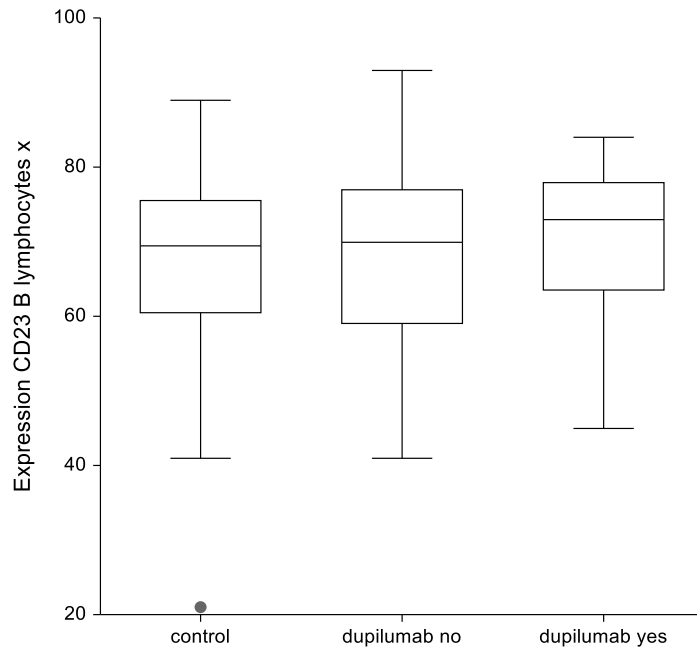

**GRAPHS TO TABLE 6. EXPRESSION OF CD200 ON B LYMPHOCYTES SUBSETS**

**Expression of CD200 on memory B lymphocytes (MFI)**

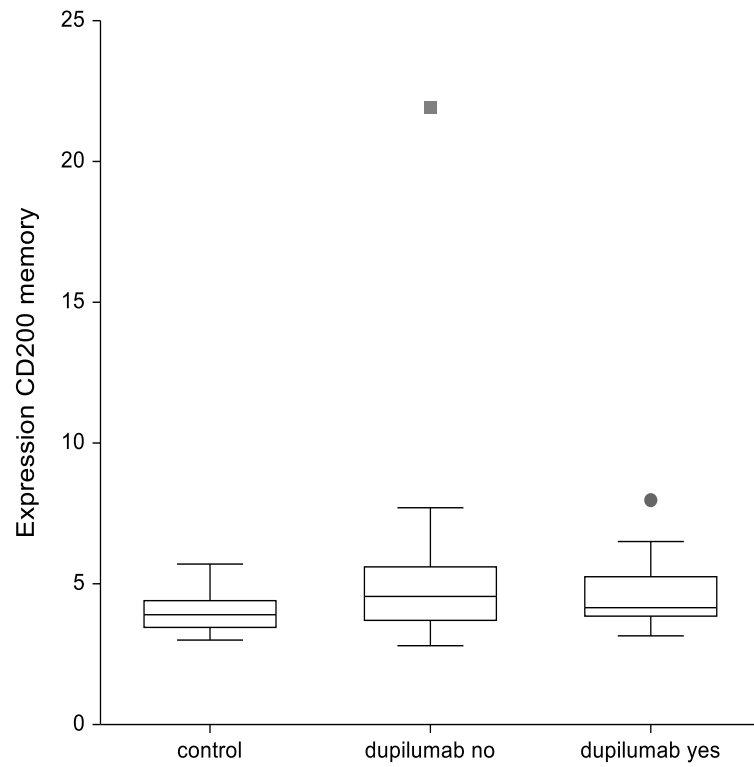

**Expression of CD200 on memory B lymphocytes (%)**

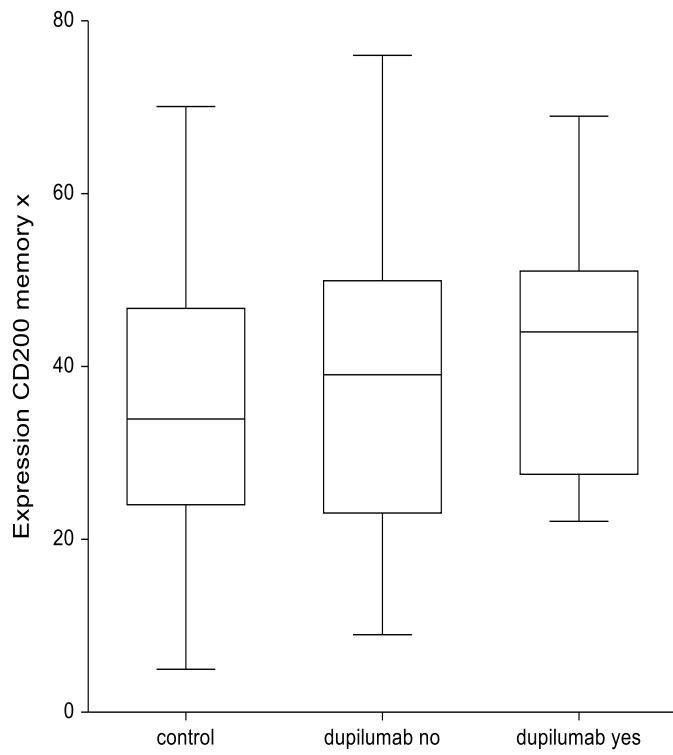

**Expression of CD200 on naive B lymphocytes (MFI)**

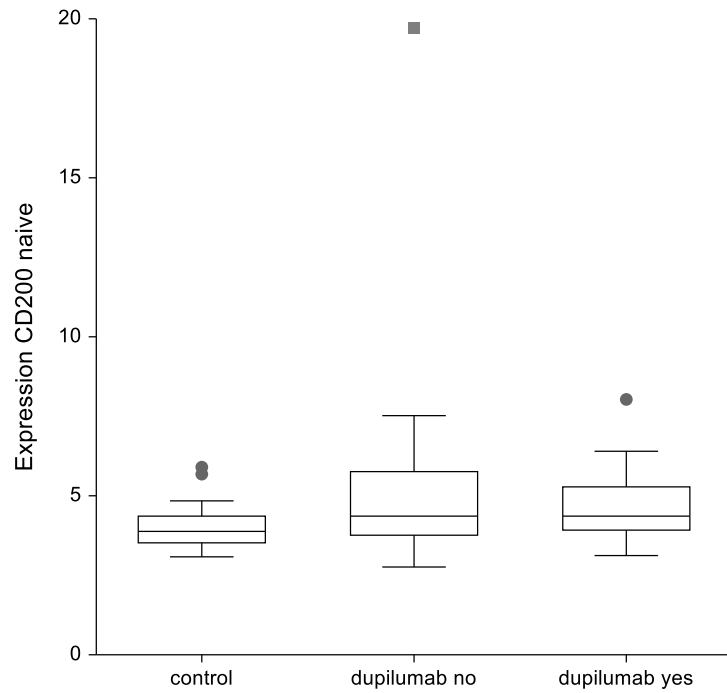

### Expression of CD200 on naive B lymphocytes (%)

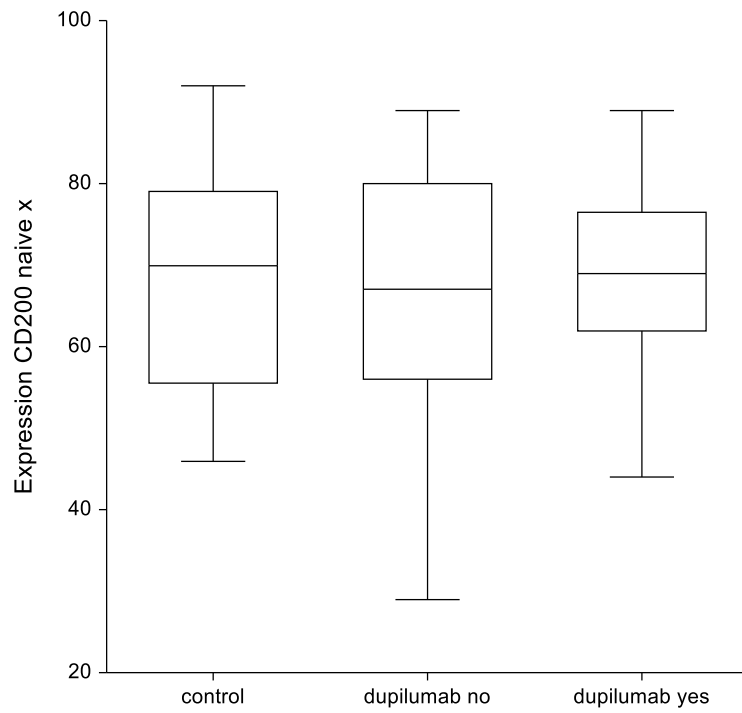

### Expression of CD200 on non-switched B lymphocytes (MFI)

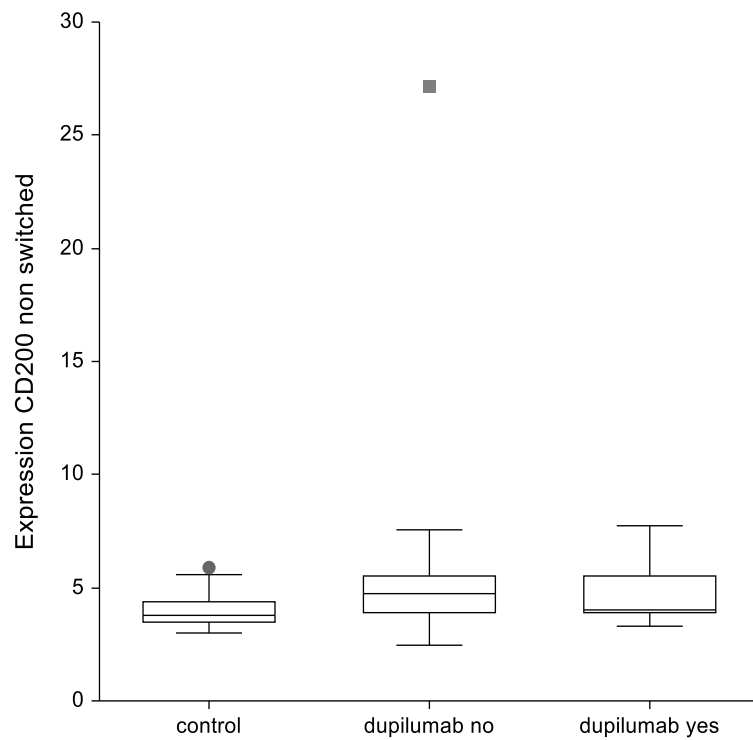

### Expression of CD200 on non-switched B lymphocytes (%)

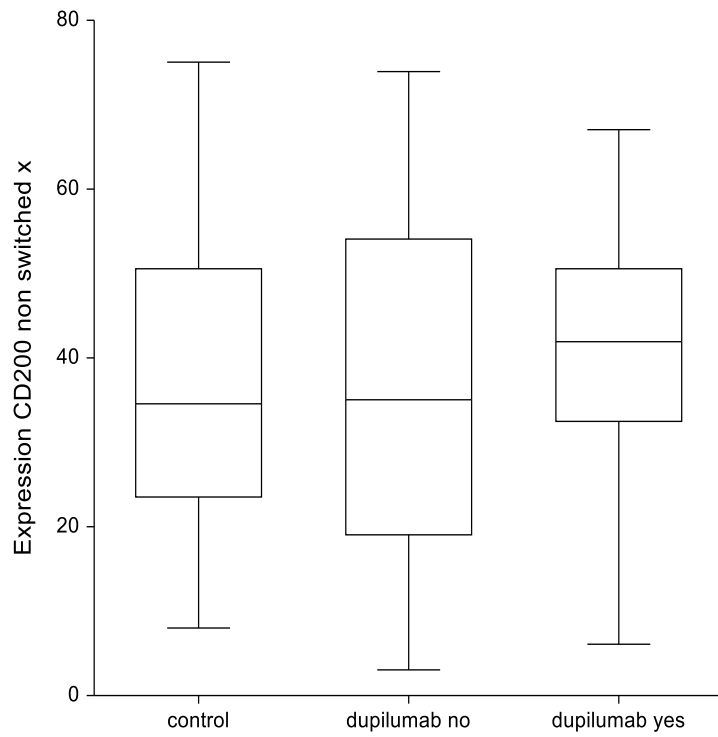

### Expression of CD200 on switched B lymphocytes (MFI)

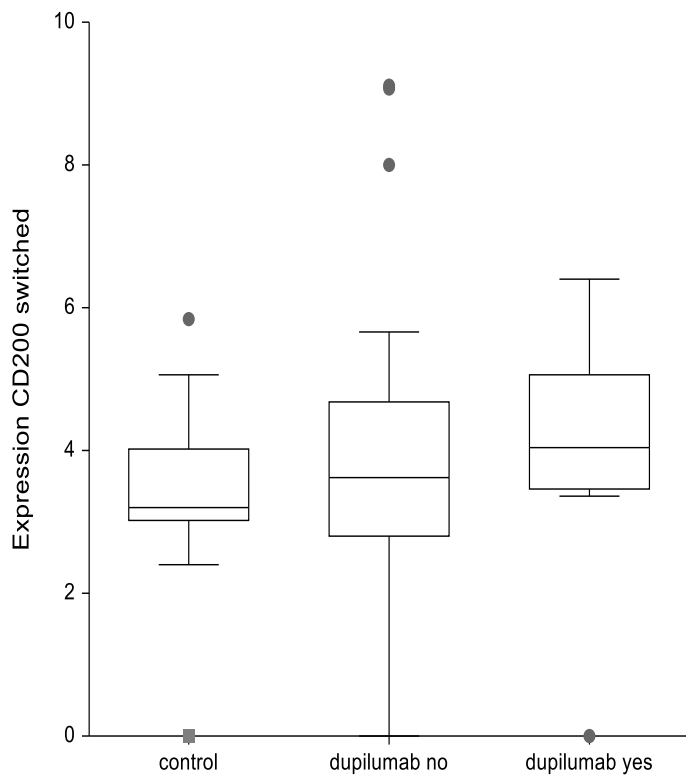

### Expression of CD200 on switched B lymphocytes (%)

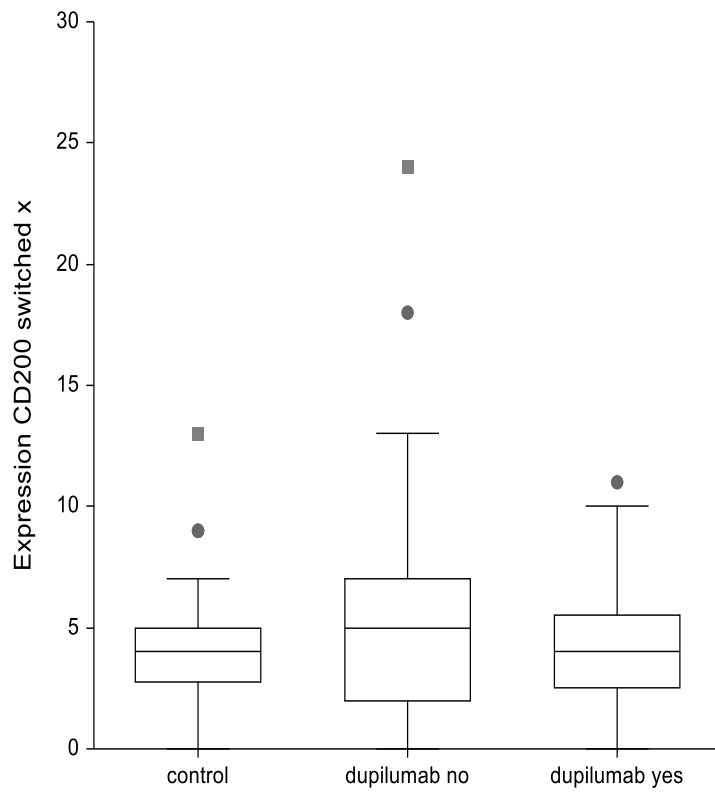

### Expression of CD200 on total B lymphocytes (MFI)

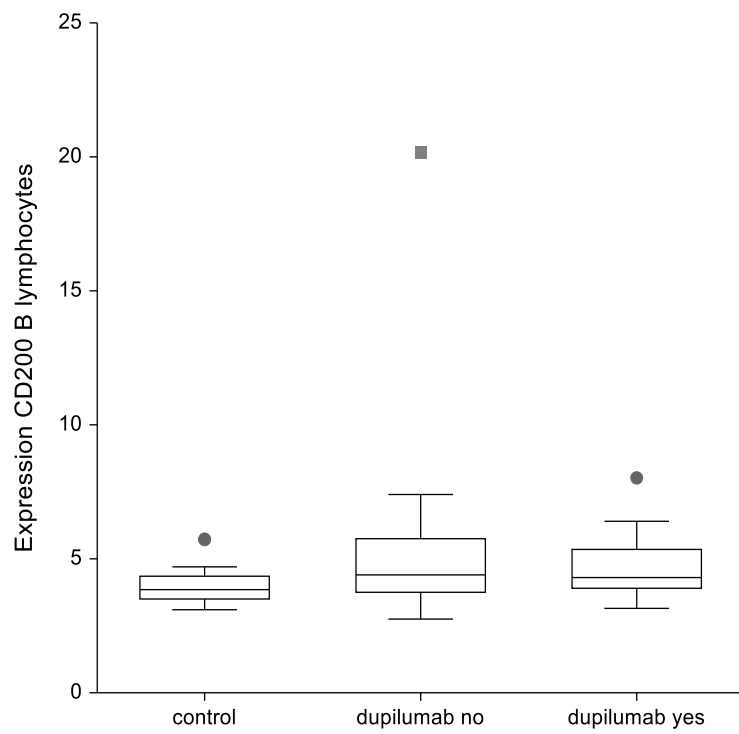



**Expression of CD200 on total B lymphocytes (%)**

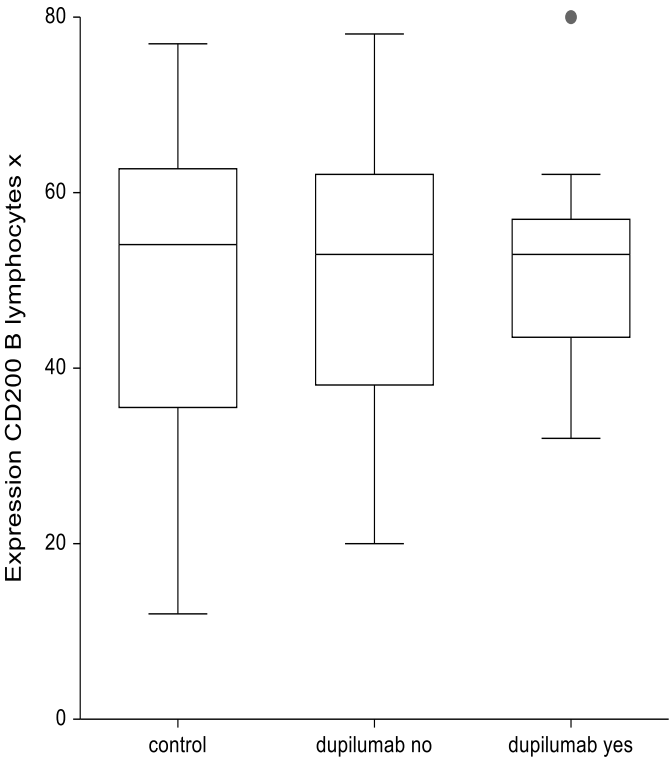

Supplement: 13555_2023_918_MOESM1_ESM.pdf [file 13555_2023_918_MOESM1_ESM.pdf]
